# Supplementary material for: Genome-Wide Association Study Singles Out SCD and LEPR as the Two Main Loci Influencing Intramuscular Fat Content and Fatty Acid Composition in Duroc Pigs
Source: PubMed Central journal article supplement (PMC4811567; doi:10.1371/journal.pone.0152496), 2016-03-29
Supplement: pone.0152496.s001.pdf [file pone.0152496.s001.pdf]

**S1 Table.** Primers used for genotyping the single nucleotide polymorphisms (SNP) in the porcine *SCD* gene promoter (AY487830:g.2228T>C) and exon 14 of *LEPR* (NM\_001024587:c.1987C>T).

| SNP                    | Primer name        | Sequence 5' → 3'          | Final concentration |
|------------------------|--------------------|---------------------------|---------------------|
| AY487830:g.2228T>C     | Primer Forward     | CCCTTCTTGGCAGCGAATAAAA    | 900 nM              |
|                        | Primer Reverse     | CAGGCTGGGTATTTAAAGGCTAGAG | 900 nM              |
|                        | Probe for C allele | VIC-CGACCGTGTCCTGTATT-NFQ | 200 nM              |
|                        | Probe for T allele | FAM-CGACCGTATCCTGTATT-NFQ | 200 nM              |
| NM_001024587:c.1987C>T | Primer Forward     | CAGAGGACCTGAATTTTGGAG     | 400 nM              |
|                        | Primer Reverse     | CATAAAAATCAGAAATACCTTCCAG | 400 nM              |
