# Supplementary material for: Genome-Wide Association Study Singles Out SCD and LEPR as the Two Main Loci Influencing Intramuscular Fat Content and Fatty Acid Composition in Duroc Pigs
Source: PubMed Central journal article supplement (PMC4811567; doi:10.1371/journal.pone.0152496), 2016-03-29
Supplement: pone.0152496.s002.pdf [file pone.0152496.s002.pdf]

**S2 Table.** Minor allele frequency and number of animals per genotype within time period for the porcine *SCD* gene promoter (AY487830:g.2228T>C) and exon 14 of *LEPR* (NM\_001024587:c.1987C>T) SNPs.

| SNP                    | Time period | f(T) | No. of animals |    |    |
|------------------------|-------------|------|----------------|----|----|
|                        |             |      | TT             | CT | CT |
| AY487830:g.2228T>C     | 2002-2003   | 0.42 | 12             | 31 | 23 |
|                        | 2009-2010   | 0.45 | 18             | 29 | 25 |
| NM_001024587:c.1987C>T | 2002-2003   | 0.49 | 14             | 34 | 15 |
|                        | 2009-2010   | 0.37 | 10             | 33 | 29 |
